# Recommendations to address uncertainties in environmental risk assessment using toxicokinetics-toxicodynamics models

Virgile Baudrot<sup>1\*</sup> and Sandrine Charles<sup>1</sup>

<sup>1</sup>Univ Lyon, Université Lyon 1, UMR CNRS 5558, Laboratoire de Biométrie et Biologie Évolutive, F-69100 Villeurbanne, France

## Abstract

Providing reliable environmental quality standards (EQS) is a challenging issue for environmental risk assessment (ERA). These EQS are derived from toxicity endpoints estimated from dose-response models to identify and characterize the environmental hazard of chemical compounds as those released by human activities. The classical toxicity endpoints are the  $x\%$  effect/lethal concentrations at a specific time  $t$  ( $EC/LC(x, t)$ ), or the multiplication factors applied to environmental exposure profiles leading to  $x\%$  of effect reduction at a specific time  $t$  ( $MF(x, t)$ ). However, classical dose-response models used to estimate the toxicity endpoints have some weaknesses such as their dependency on observation time-points which are likely to differ between species. Also, real exposure profiles are hardly ever constant over time, what makes impossible the use of classical dose-response models and compromises the derivation of  $MF(x, t)$ , actually designed to tackle time-variable exposure profiles. When dealing with survival or immobility toxicity test data, these issues can be overcome with the use of the General Unified Threshold model of Survival (GUTS), a toxicokinetics-toxicodynamics (TKTD) model, providing an explicit framework to analyse both time and concentration-dependent data sets, as well as a mechanistic derivation of  $EC/LC(x, t)$  and  $MF(x, t)$  whatever  $x$  and at any time  $t$  of interest. In addition, the assessment of a risk is inherently built upon probability distributions, so that the next critical step for ERA is to characterize uncertainties of toxicity endpoints, and sequentially of EQS. The innovative approach investigated in our paper is the use of the Bayesian framework to deal with uncertainties arising in the calibration process and propagated all along the successive prediction steps until the  $LC(x, t)$  and  $MF(x, t)$  derivations. We also explored the mathematical properties of  $LC(x, t)$  and  $MF(x, t)$  as well as the impact of different experimental designs in order to provide some recommendations for a robust derivation of toxicity endpoints leading to reliable EQS.

**Keywords.** Survival models ; Dose-Response ; GUTS ; Lethal Concentration ; Multiplication Factor ; Margin of safety ; Environmental Risk Assessment

## 1. Introduction

Assessing the environmental risk of chemical compounds requires environmental quality standards (EQS) such as PNECs, RACs and MAC-EQS under the ECHA, EFSA PPR and WFP regulatory

33 frameworks respectively (EFSA PPR, 2013; ECHA, 2017). Derivation of EQS results from the com-  
34 bination of assessment factors with toxicity endpoints mainly derivated from estimated or measured  
35 exposure response of a set of target species to that chemical compound (EFSA PPR, 2013; Isigonis  
36 et al., 2015; Syberg and Hansen, 2016; ECHA, 2017). Deriving reliable toxicity endpoints is challenging  
37 and the subject matter is very controversial (Laskowski, 1995; Jager, 2011). Today, Environmental  
38 Risk Assessment (ERA) rests on fitting classical dose-response models to quantitative toxicity test  
39 data. For acute effect assessment, such data are collected from standard toxicity tests, from which the  
40 50% lethal or effective concentration ( $LC_{50}$  or  $EC_{50}$ ) is generally estimated at the end of the exposure  
41 duration, meaning that the monitoring of observations over time is not fully exploited. In addition,  
42 classical dose-response models implicitly assume that the exposure concentration remains constant  
43 all along the experiment, what makes difficult to extrapolate the results to more realistic scenarios  
44 with time-variable exposure profiles combining different heights, widths and frequencies of contami-  
45 nant pulses (Reinert et al., 2002; Brock, 2009; Jager, 2011; Ashauer et al., 2013). To overcome this  
46 gap at the organism level, the use mechanistic models, such as toxicokinetics-toxicodynamics (TKTD)  
47 models, is now promoted in order to describe the effects of a substance of interest by integrating  
48 the dynamics of the exposure (Jager et al., 2011; EFSA PPR, 2013; Hommen et al., 2016). Indeed,  
49 TKTD models appear highly advantageous in terms of mechanistic understanding of the chemical  
50 mode of action, of deriving time-independent parameters, of interpreting time-varying exposure and  
51 of making predictions under untested situations (Jager et al., 2011; Ashauer et al., 2013). Another of  
52 their advantages for ERA is the possible calculation of any  $x\%$  lethal  $LC(x, t)$  or effective  $EC(x, t)$   
53 whatever  $x$  and at any given exposure duration  $t$ . Also, from time-variable concentration profiles as  
54 observed in the environment, it is possible to estimate a margin of safety such as the exposure multi-  
55 plication factor,  $MF(x, t)$ , leading to any  $x\%$  of effect reduction due to the contaminant at any time  
56  $t$  (Ashauer et al., 2013). When focusing on survival rate of individuals, a General Unified Threshold  
57 model of Survival (GUTS) has been proposed to unify the majority of TKTD survival models (Jager  
58 et al., 2011). In the present paper, we consider the two most used derivations named Stochastic Death  
59 (GUTS-RED-SD) and Individual Tolerance (GUTS-RED-IT). GUTS-RED-SD model assumes that all  
60 individuals are identically sensitive to the chemical substance by sharing a common internal threshold  
61 concentration and that mortality is a stochastic process once this threshold is reached. On the con-  
62 trary, GUTS-RED-IT model is based on the Critical Body Residues (CBR) approach, which assumes  
63 that individuals differ in their threshold, following a probability distribution, and die as soon as the  
64 internal concentration reaches the individual-specific threshold (Jager et al., 2011). The robustness of  
65 GUTS models for calibration and prediction has been widely demonstrated in previous studies, with  
66 little differences between both GUTS-RED-SD and GUTS-RED-IT models in terms of calibration and  
67 prediction (Ashauer et al., 2013; Baudrot et al., 2018c; Jager and Ashauer, 2018). Sensitivity analysis

68 of toxicity endpoints derivated from GUTS, such as  $LC(x, t)$  and  $MF(x, t)$ , have also been investigated  
69 (Ashauer et al., 2013; Baudrot et al., 2018c), but the question of how uncertainties are propagated is  
70 still under-studied.

71 Quantifying uncertainties or level of confidence associated with toxicity endpoints is undoubtedly a  
72 way to improve trust in risk predictors and to avoid decision that could increase, rather than decrease,  
73 the risk (Gray and Cohen, 2012; Beck et al., 2016). The Bayesian framework has many advantages to  
74 deal with uncertainties since the distribution of parameters, and so their uncertainties, is embedded  
75 in the inference process. While the construction of priors on model parameters can be seen as a  
76 carrier of subjectivity (Ferson, 2005), there is a proved added-value by taking advantage of information  
77 from the experimental design (Delignette-Muller et al., 2017; Baudrot et al., 2018c). Consequently,  
78 coupling TKTD models with Bayesian inference allows to estimate the probability distribution of  
79 toxicity endpoints, and any other predictions coming from the mechanistic (TKTD) model, by taking  
80 into account all the constraints resulting from the experimental design. Moreover, Bayesian inference,  
81 which revealed particularly efficient with GUTS models (Delignette-Muller et al., 2017; Baudrot et al.,  
82 2018c), can also be used to optimize the experimental design by quantifying the gain of knowledge  
83 from priors to posteriors (Albert et al., 2012). At last, Bayesian inference is also tailored for decision  
84 making as it confronts the assessors with a range of values, rather than just a point, which is particularly  
85 valuable for risk assessment (Ferson, 2005; Gray and Cohen, 2012).

86 In the present study, we explore how scrutinizing uncertainties helps to provide recommendations on  
87 the experimental design and the characteristics of toxicity endpoints used for EQS, while maximizing  
88 their reliability. We first give an overview of TKTD models with a focus on GUTS (Jager et al.,  
89 2011). Handling GUTS models within the R-package *morse* (Baudrot et al., 2018a) is then illustrated  
90 with five example data sets. Then, we explore how a variety of experimental designs influence the  
91 uncertainties in derived  $LC(x, t)$  and  $MF(x, t)$ . Finally, we provide a set of recommendations on the  
92 use of TKTD models for ERA, based on their added-value and the way the uncertainty may be handled  
93 under the Bayesian framework.

## 94 **2. Material and methods**

### 95 *2.1. Data from experimental toxicity tests*

96 We used experimental toxicity data sets, detailed in (Ashauer et al., 2011; Nyman et al., 2012;  
97 Ashauer et al., 2016) testing all together five chemical compounds (carbendazim, cypermethrin, dimethoate,  
98 malathion and propiconazole) on the survival rate of the amphipod crustacean *Gammarus pulex*. Two  
99 experiments were performed for each compound, one exposing *G. pulex* to constant concentrations,  
100 and the other exposing *G. pulex* to time-variable concentrations (see Table 1). In constant exposure  
101 experiments, *G. pulex* was exposed to eight concentrations for four days. In time-variable exposure

102 experiments, *G. pulex* was exposed to two different pulse profiles, consisting in two one-day exposure  
 103 pulses with short and longer interval between them.

Table 1: Characteristics of data sets used in the manuscript. The "Profile type" is the type of exposure profiles (constant or time-variable), "Data points" refers to the number of data points in the data set, "Nbr profiles" is the number of profiles in the dataset " $N_{init}$ " is the initial number of individuals in profile, "Nbr days" is the number of days for each experiment, and "Time points per profile" is the number of time points for each time series (each constant profiles consisted in 5 time-points).

| Product       | Profile type | Data points | Nbr profiles | $N_{init}$ | Nbr days | Time points per profile |
|---------------|--------------|-------------|--------------|------------|----------|-------------------------|
| Carbendazim   | constant     | 40          | 8            | 20         | 4        | 5                       |
| Cypermethrin  | constant     | 40          | 8            | 20         | 4        | 5                       |
| Dimethoate    | constant     | 40          | 8            | 20         | 4        | 5                       |
| Malathion     | constant     | 40          | 8            | 20         | 4        | 5                       |
| Propiconazole | constant     | 40          | 8            | 20         | 4        | 5                       |
| Carbendazim   | variable     | 51          | 4            | 80         | 10       | [8, 14, 16, 13]         |
| Cypermethrin  | variable     | 61          | 4            | 80         | 10       | [10, 18, 18, 15]        |
| Dimethoate    | variable     | 58          | 4            | 80         | 10       | [10, 16, 17, 15]        |
| Malathion     | variable     | 70          | 2            | 70         | 22       | [35, 35]                |
| Propiconazole | variable     | 74          | 4            | 70         | 10       | [11, 21, 21, 21]        |

## 104 2.2. GUTS modelling

105 In the following, we detail the mathematical equations of GUTS models describing the survival rate  
 106 over time for organisms exposed to a profile of concentrations of a single chemical product. All other  
 107 possible derivations of GUTS models are fully described in (Jager et al., 2011; Jager and Ashauer,  
 108 2018). We provide here a summary of GUTS-RED-SD and GUTS-RED-IT reduced models in order  
 109 to introduce notations and equations relevant for mathematical derivation of explicit formulations of  
 110 the  $x\%$  Lethal Concentration at time  $t$ , denoted  $LC(x, t)$ , and of the Multiplication Factor leading to  
 111  $x\%$  mortality at time  $t$ , denoted  $MF(x, t)$ .

### 112 2.2.1. Toxicokinetics

113 We denote  $C_w(t)$  the external concentration of a chemical product which can be variable over time.  
 114 As there is no measure of internal concentration, we use the scaled internal concentration, denoted  
 115  $D_w(t)$ , which is therefore a latent variable as described by the toxicokinetics part of the model as  
 116 follows:

$$\frac{dD_w(t)}{dt} = k_d(C_w(t) - D_w(t)) \quad (1)$$

117 where  $k_d [time^{-1}]$  is the dominant rate constant, corresponding to the slowest compensating process  
 118 dominating the overall dynamics of toxicity.

119 As we assume that the internal concentration equal 0 at  $t = 0$ , the explicit formulation for constant

120 concentration profiles is given by:

$$D_w(t) = C_w (1 - e^{-k_d t}) \quad (2)$$

121 An explicit expression for time-variable exposure profiles is provided in Supplementary Material as  
 122 it can be useful for implementation, but not for mathematical calculus below. The GUTS-RED-SD  
 123 and GUTS-RED-IT models are based on the same model for the scaled internal concentration. They  
 124 do not differ in the TK part, but in the TD part describing the death mechanism.

125 From the toxicokinetics equation (2), we can easily compute the  $x\%$  depuration time, that is the  
 126 period of time after a pulse leading to  $x\%$  of reduction in the scaled internal concentration:

$$DRT_x = \frac{-\log(x\%)}{k_d} \quad (3)$$

### 127 2.2.2. Toxicodynamics

128 *Model GUTS-RED-SD:* The GUTS-RED-SD model supposes that all the organisms have the same  
 129 internal threshold concentration, denoted  $z$  [ $mol.L^{-1}$ ], and that, once exceeded, the instantaneous  
 130 probability to die, named  $h(t)$ , increases linearly with the internal concentration. The mathematical  
 131 equation is:

$$h(t) = b_w \max_{0 \leq \tau \leq t} (D_w(\tau) - z, 0) + h_b \quad (4)$$

132 where  $b_w$  [ $L.mol.time^{-1}$ ] is the killing rate and  $h_b$  [ $time^{-1}$ ] is the background mortality rate.

133 Then, the survival probability along time under GUTS-RED-SD model is given by:

$$S_{SD}(t) = \exp\left(-\int_0^t h(\tau) d\tau\right) \quad (5)$$

134 *Model GUTS-RED-IT:* The GUTS-RED-IT model supposes that the threshold concentration is dis-  
 135 tributed among organisms, and that the death is immediate as soon as this threshold is reached. The  
 136 probability to die at the maximal internal concentration with background mortality  $h_b$  is given by:

$$S_{IT}(t) = \exp(-h_b t) (1 - F(\max_{0 < \tau < t} (D_w(\tau)))) \quad (6)$$

137 Assuming a log-logistic function, we get  $F(x) = \frac{1}{1 + (x/m_w)^{-\beta}}$ , with  $m_w$  [ $mol.L^{-1}$ ] the median  
 138 and  $\beta$  the shape of the threshold distribution, what gives:

$$S_{IT}(t) = \exp(-h_b t) \left( 1 - 1 / \left( 1 + \left( \frac{\max_{0 \leq \tau \leq t} (D_w(\tau))}{m_w} \right)^{-\beta} \right) \right) \quad (7)$$

### 139 2.3. Implementation and Bayesian inference

140 GUTS models were implemented within a Bayesian framework through *JAGS* (Plummer, 2016)  
141 by using the R-package *morse* (Baudrot et al., 2018a). The Bayesian inference methods, choice of  
142 priors and parameterisation of MCMC process have previously been fully explained (Delignette-Muller  
143 et al., 2017; Baudrot et al., 2018c,a). The joint posterior distribution of parameters was used to  
144 predict survival curve under tested and untested exposure profiles, for the calculation of  $LC(x, t)$  and  
145  $MF(x, t)$ , and for the computing of goodness-of-fit measures (see hereinafter). The use of the joint  
146 posterior distribution allow to quantify the uncertainty around all these predictions, and therefore the  
147 computing of their median and their 95% credible intervals as follow: under a specific exposure profile,  
148 we simulated the survival rate over time for every joint posterior parameter set ; then at each time  
149 point of the time series, we computed 0.5, 0.025 and 0.975 quantiles, thus providing median and 95%  
150 limits.

### 151 2.4. Measures of model robustness

152 Modelling is always associated with testing its robustness: the robustness in fitting data used for  
153 calibration, but also the robustness for predictions on new data (Grimm and Berger, 2016). To evaluate  
154 the robustness of estimations and predictions with the two GUTS models, we calculated their statistical  
155 properties by means of the Normalized Root Mean Square Error (NRMSE), the Posterior Predictive  
156 Check (PPC), the Watanabe-Akaike Information Criterion and the Leave-One-Out Cross-Validation  
157 (LOO-CV) (Gelman et al., 2013).

#### 158 2.4.1. Normalized Root Mean Square Error

159 The Root Mean Square Error (RMSE) allows to characterize the difference between observations  
160 and predictions from the posterior distribution. With  $N$  observations and  $y_{i,obs}$  the observed number  
161 of individuals ( $i \in \{1, \dots, N\}$ ), then for each estimation  $y_{.,j}$  of the markov chain of size  $M$  ( $j \in$   
162  $\{1, \dots, M\}$ ) resulting from the Bayesian inference, we can define the  $RMSE_j$  such as:

$$RMSE_j = \sqrt{\frac{1}{N} \sum_i (y_{i,j} - y_{i,obs})^2} \Rightarrow NRMSE_j = \frac{RMSE_j}{\overline{y_{obs}}} \quad (8)$$

163 Where Normalized RMSE (NRMSE) is given by dividing RMSE with the mean of the observations  
164 denoted  $\overline{y_{obs}}$ . We then have the distribution of the NRMSE from which we returned the median and  
165 the 95% credible interval in Table 2.

#### 166 2.4.2. Posterior Predictive Check (PPC)

167 The Posterior Predictive Check consists in comparing replicated data drawn from the joint posterior  
168 distribution to observed data. A measure of goodness-of-fit is the percentage of observed data lying  
169 within the 95% predicted credible intervals (Gelman et al., 2013).

170 *2.4.3. WAIC and LOO-CV*

171 Information criteria as WAIC and LOO-CV are common measures of predictive precision also used  
 172 to compare models. The WAIC is the sum of the log predictive density computed for every points,  
 173 to which a bias is added to take into account the number of parameters. The LOO-CV use the log  
 174 predictive density estimated from a training subset and applied it on another one (Gelman et al., 2013).  
 175 Both WAIC and LOO-CV were computed with the R-package *bayesplot* (Gabry and Mahr, 2017).

176 *2.5. Mathematical definition and properties of  $LC(x, t)$*

177 The  $LC(x, t)$  makes sense only in the situation of constant exposure profiles (i.e., whatever time  
 178  $t$ ,  $C_w(t)$  is constant). In such situations, we can provide an explicit formulation of the survival rate  
 179 over time considering both models GUTS-RED-SD and GUTS-RED-IT. Many software provides an  
 180 implementation of GUTS models what facilitate the possibility to compute the  $LC(x, t)$  at any time  
 181 and any  $x\%$  (Jager and Ashauer, 2018). Our Bayesian implementation of GUTS models using the R  
 182 language is one of them (Baudrot et al., 2018a).

183 Let  $LC(x, t)$  be the lethal concentration for  $x\%$  of organisms at any time  $t$ , and  $S(C, t)$  be the  
 184 survival rate at constant concentration  $C$  and time  $t$ . Then, the  $LC(x, t)$  is defined as:

$$S(LC(x, t), t) = S(0, t) \left(1 - \frac{x}{100}\right) \quad (9)$$

185 where  $S(0, t)$  is the survival rate at time  $t$  when there is no contaminant, which reflects the back-  
 186 ground mortality.

187 *2.5.1. GUTS-RED-SD model*

188 The lethal concentration  $LC_{SD}(x, t)$  is given by:

$$LC_{SD}(x, t) = \frac{-k_d \ln \left(1 - \frac{x}{100}\right)}{b_w (k_d(t - t_z) - e^{-k_d t_z} + e^{-k_d t})} + \frac{k_d z (t - t_z)}{k_d(t - t_z) - e^{-k_d t_z} + e^{-k_d t}} \quad (10)$$

189 As mention in Supplementary Material, under time-variable exposure,  $t_z$  is also variable with time,  
 190 while in the case of constant exposure,  $t_z$  is exactly  $-1/k_d \ln(1 - z/C_w)$ . When time increase, the  
 191  $LC_{SD}(x, t)$  curve become a vertical line at point  $z$ , and when time tends to infinity, the convergence  
 192 is:

$$\lim_{t \rightarrow +\infty} LC_{SD}(x, t) = z \quad , \quad \text{with} \quad t_z = \frac{-1}{k_d} \ln \left(1 - \frac{z}{LC_{SD}(x, t)}\right) \quad (11)$$

193 *2.5.2. GUTS-RED-IT model*

194 The lethal concentration  $LC_{IT}(x, t)$  is given by:

$$LC_{IT}(x, t) = \frac{m_w}{(1 - e^{-k_d t})^\beta} \sqrt[\beta]{\frac{x}{100 - x}} \quad (12)$$

195 It is then straightforward to see that when  $t$  increases, the  $LC_{IT}(x, t)$  converges to:

$$\lim_{t \rightarrow +\infty} LC_{IT}(x, t) = m_w \sqrt[\beta]{\frac{x}{100 - x}} \quad (13)$$

196 In the specific case of  $x = 50\%$ , we get:  $\lim_{t \rightarrow +\infty} LC(50, t) = m_w$ .

197 *2.5.3. Calculation of the density distribution of  $LC(x, t)$*

198 The calculation of  $LC(x, t)$  is based on equation (9). Then, using the GUTS models and the  
 199 estimates of parameters from the calibration processes, we compute the survival rate without contam-  
 200 ination (i.e., the background mortality denoted  $S(0, t)$ ) and a set of prediction of the survival rate over  
 201 a range of concentrations (i.e.,  $S(C, t)$ ). This process provides the distribution of the  $LC(x, t)$  using  
 202 equation (9).

203 *2.6. Mathematical definition and properties of the multiplication factor  $MF(x, t)$*

204 Contrary to the lethal concentration  $LC(x, t)$  used in situations of constant exposure profiles, the  
 205 multiplication factor,  $MF(x, t)$  can be computed for both constant and time-variable exposure profiles.

206 With the exposure profile  $C_w(\tau)$ , with  $\tau$  running from 0 to  $t$ , the  $MF(x, t)$  is defined as:

$$S(MF(x, t) \times C_w(\tau), t) = S(0, t) \left(1 - \frac{x}{100}\right) \quad (14)$$

207 In the Supplementary Material, we show that the internal damage  $D_w(t)$  is linearly related to  
 208 the multiplication factor since whatever the exposure profile (constant or time-variable), we get the  
 209 following relation:

$$D_w^{MF}(t) = MF(x, t) \times D_w(t) \quad (15)$$

210 where  $D_w^{MF}(t)$  is the internal damage when the exposure profile is multiplied by  $MF(x, t)$ .

211 *2.6.1. GUTS-RED-SD model*

212 The multiplication factor  $MF_{SD}(x, t)$  is given by:

$$MF_{SD}(x, t) = \frac{-\frac{1}{b_w} \ln\left(1 - \frac{x}{100}\right) + \int_0^t \max_{0 < \tau < t} (D_w(\tau) - z, 0) d\tau}{\int_0^t \max_{0 < \tau < t} \left(D_w(\tau) - \frac{z}{MF(x, t)}, 0\right) d\tau} \quad (16)$$



213 When the external concentration is constant, we can use the explicit expression of  $D_w(t)$  for  $C_w(t) =$   
 214  $C_w$ , and get:

$$MF_{SD}(x, t) = \frac{-\frac{1}{b_w} \ln\left(1 - \frac{x}{100}\right) + \frac{C_w}{k_d} (e^{-k_d t} - e^{-k_d t_z}) + (C_w - z)(t - t_z)}{\frac{C_w}{k_d} (e^{-k_d t} - e^{-k_d t_{z, MF}}) + \left(C_w - \frac{z}{MF(x, t)}\right) (t - t_{z, MF})} \quad (17)$$

215 where  $t_z$  has been previously defined and  $t_{z, MF} = \frac{-1}{k_d} \ln\left(1 - \frac{z}{MF(x, t)C_w}\right)$ . As for the  $LC_{SD}(x, t)$ ,  
 216 the expression of  $t_{z, MF}$  prevents to have a whole explicit formulation of  $MF_{SD}(x, t)$ .

### 217 2.6.2. GUTS-RED-IT model

218 The multiplication factor  $MF_{IT}(x, t)$  is given by:

$$MF_{IT}(x, t) = \sqrt[\beta]{\frac{100 + x \left(\frac{\max_{0 < \tau < t} (D_w(\tau))}{m_w}\right)^{-\beta}}{100 - x}} \quad (18)$$

219 Therefore, from a GUTS-RED-IT model, solving the toxicokinetics part giving  $\max_{0 < \tau < t} (D_w(\tau))$  is enough  
 220 to find any multiplication factor for any  $x$  at any  $t$ . When the external concentration is constant, this  
 221 maximum is  $C_w (1 - e^{-k_d t})$ .

## 222 3. Results

### 223 3.1. Goodness-of-fit of GUTS-RED-SD and GUTS-RED-IT

224 For all compounds, Table 2 shows that fitting on constant exposure profiles provide better fit than  
 225 for time-variable exposure profiles (see also graphics of Posterior Predictive Check in Supplementary  
 226 Material), whatever the measure of goodness-of-fit (except with the NRMSE measure of GUTS-RED-  
 227 IT on dimethoate). This result could be expected since, as pointed by Table 1, there are always more  
 228 time series in data sets with constant exposure profiles. But also, since there are explicit solutions  
 229 of differential equations with constant exposure profiles for both models GUTS-RED-SD and GUTS-  
 230 RED-IT, the computing process is easier contrary to time-variable exposure profile requiring the use  
 231 of a numerical integrator.

232 For validation, whatever the measure of goodness-of-fit, predictions are always better when pa-  
 233 rameters are calibrated on data sets with variable exposure profiles to then predict on data set under  
 234 constant exposure profiles, than the other way round.

235 Based on Table 2, it is hard to differentiate GUTS-RED-SD from GUTS-RED-IT with the quality of  
 236 their fits. At least, we can notice that GUTS-RED-IT model is particularly bad for Carbendazim and  
 237 Dimethoate under time-variable exposure profiles. Still under variable exposure profiles, for Malathion

238 and Propiconazole data sets, we can observed a large 95% credible interval for GUTS-RED-IT (see  
 239 figures in Supplementary Material). While NRMSE and %PPC tend to better qualified GUTS-RED-  
 240 IT, the uncertainty is penalized with Bayesian measures WAIC and LOO-CV. In fact, the percentage  
 241 of recovery extracted from a PPC is totally blind to point large credible interval, since it increases  
 242 when the credible interval increases.

Table 2: Results of calibration and validation of models GUTS-RED-SD and GUTS-RED-IT for the five chemical compounds: Carbenazim (car), Cypermethrin (cyp), Dimethoate (Dim), Malathion (mal) and Propiconazole (prz). Profiles of exposure concentration are either constant, denoted *cst*, or variable, denoted *var*. The notation *cst* → *var* means that calibration was done on data set of constant exposure and validation was done on data set of time-variable exposure profile (see data set in Table 1). The measures NRMSE, %PPC, WAIC and LOO-CV assess the goodness-of-fit and are fully explained in section 2.4.

| Product                                                                                          | Profile   | GUTS SD |      |        |        | GUTS IT |      |        |        |
|--------------------------------------------------------------------------------------------------|-----------|---------|------|--------|--------|---------|------|--------|--------|
|                                                                                                  |           | NRMSE   | %PPC | WAIC   | LOO-CV | NRMSE   | %PPC | WAIC   | LOO-CV |
| <b>Calibration</b>                                                                               |           |         |      |        |        |         |      |        |        |
| car                                                                                              | cst       | 0.112   | 100  | 402.41 | 403.27 | 0.124   | 100  | 420.11 | 422.09 |
| cyp                                                                                              | cst       | 0.095   | 100  | 196.37 | 206.78 | 0.092   | 100  | 188.07 | 189.09 |
| dim                                                                                              | cst       | 0.122   | 97.5 | 308.94 | 309.41 | 0.171   | 90.0 | 357.38 | 358.74 |
| mal                                                                                              | cst       | 0.090   | 100  | 248.87 | 249.59 | 0.112   | 92.5 | 273.01 | 273.54 |
| prz                                                                                              | cst       | 0.102   | 100  | 282.03 | 285.57 | 0.118   | 80.0 | 308.03 | 314.93 |
| car                                                                                              | var       | 0.159   | 82.1 | 1006.0 | 1012.1 | 0.499   | 32.1 | 1222.4 | 1216.4 |
| cyp                                                                                              | var       | 0.196   | 91.7 | 829.04 | 833.48 | 0.116   | 97.2 | 793.95 | 801.23 |
| dim                                                                                              | var       | 0.129   | 83.3 | 1224.8 | 1226.8 | 0.161   | 55.6 | 1357.2 | 1344.7 |
| mal                                                                                              | var       | 0.196   | 97.8 | 762.58 | 766.76 | 0.148   | 100  | 908.56 | 934.80 |
| prz                                                                                              | var       | 0.164   | 95.5 | 951.10 | 894.02 | 0.038   | 97.7 | 3262.8 | 1436.2 |
| <b>Validation:</b> data used for parameter calibration → data for prediction and goodness-of-fit |           |         |      |        |        |         |      |        |        |
| car                                                                                              | cst → var | 0.159   | 42.9 | 17709  | 4578.4 | 0.148   | 50.0 | 12800  | 4541.0 |
| cyp                                                                                              | cst → var | 0.196   | 91.7 | 1760.5 | 1423.5 | 0.183   | 88.9 | 1283.4 | 1141.0 |
| dim                                                                                              | cst → var | 0.129   | 83.3 | 1845.7 | 1685.3 | 0.199   | 63.9 | 1708.7 | 1628.9 |
| mal                                                                                              | cst → var | 0.196   | 67.4 | 10162  | 2610.7 | 0.169   | 63.0 | 1258.5 | 1286.1 |
| prz                                                                                              | cst → var | 0.164   | 95.5 | 940.54 | 900.90 | 0.176   | 90.9 | 894.41 | 940.74 |
| car                                                                                              | var → cst | 0.164   | 67.5 | 537.14 | 537.79 | 0.228   | 90.0 | 437.01 | 437.01 |
| cyp                                                                                              | var → cst | 0.071   | 82.5 | 537.62 | 488.90 | 0.051   | 87.5 | 453.65 | 378.89 |
| dim                                                                                              | var → cst | 0.013   | 97.5 | 302.24 | 302.30 | 0.157   | 87.5 | 389.32 | 393.68 |
| mal                                                                                              | var → cst | 0.053   | 80.0 | 470.28 | 512.86 | 0.049   | 90.0 | 869.45 | 732.94 |
| prz                                                                                              | var → cst | 0.040   | 77.5 | 797.60 | 660.09 | 0.041   | 80.0 | 1661.3 | 1107.8 |

243 3.2. Comparison of  $LC(x, t)$  with GUTS-RED-SD and GUTS-RED-IT

244 There is no obvious difference between GUTS-RED-SD and GUTS-RED-IT in their goodness-of-fit  
 245 nor in the calculation of  $LC(x, t)$  along time  $t$  or percentage of affected population,  $x$ .

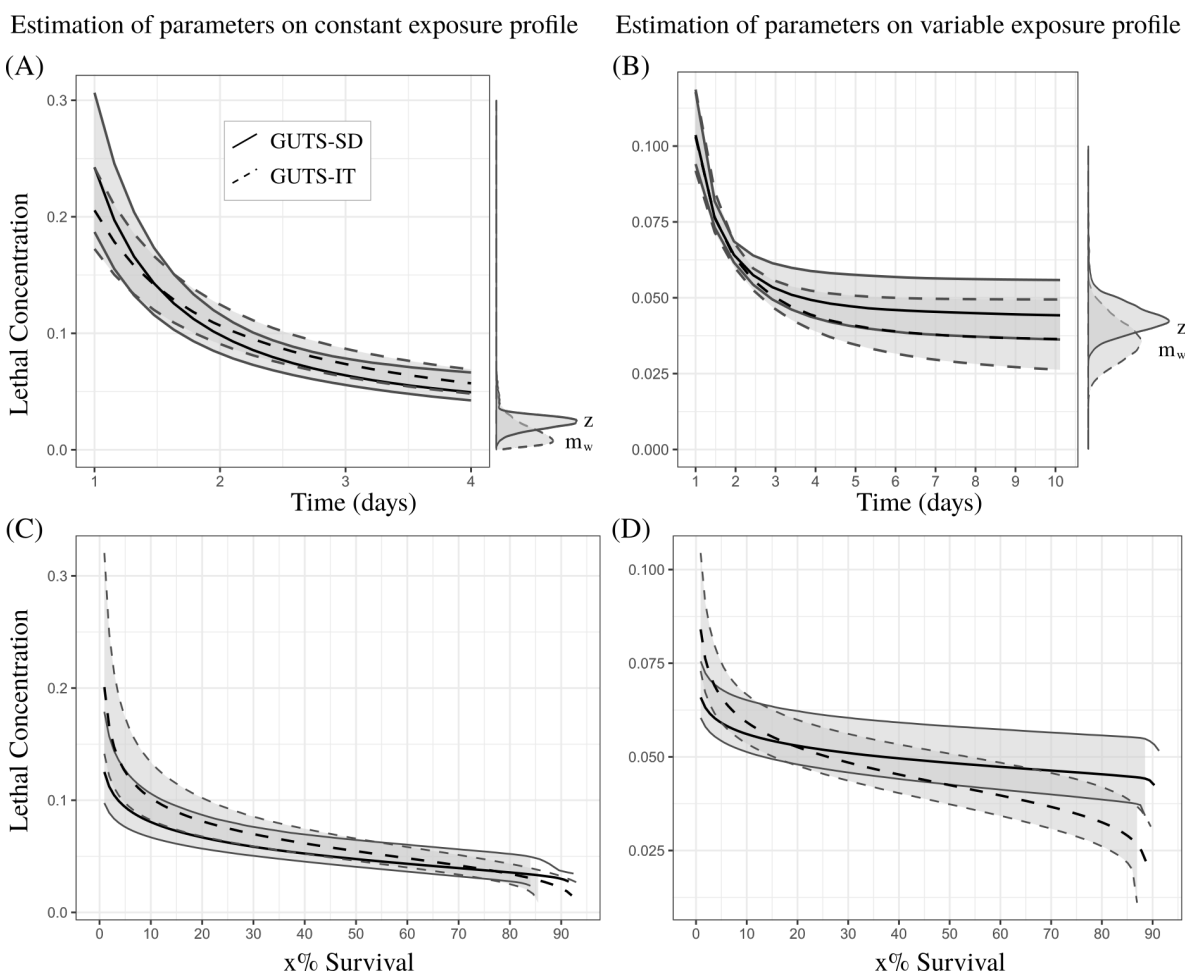

Figure 1: Comparison of  $LC(x, t)$  for GUTS-RED-SD, solid lines, and GUTS-RED-IT, dashed lines, for Cypermethrin (see Supplementary Material for other compounds). Parameters are estimated on data under constant (A, C) and variable (B, D) concentration profiles. Black lines are median and grey zones are 95 % credible bands. (A, B) Lethal concentration for 50% of the organisms ( $LC(50, t)$ ) from day 1 to the end of the experiment. (C, D) Lethal concentration at the end of experiment (4 and 10 days respectively) along the percentage of population affected.

246 3.2.1.  $LC(x, t)$  as a function of time  $t$

247 As expected, from Figures 1-(A,B) and Supplementary Material, we see that  $LC(x, t)$  decreases  
 248 with time. Rarely pointed is the shape of this decrease which is exponential and converges toward  
 249 different values according to the model. This asymptotic behavior is known as the incipient  $LC(x, t)$   
 250 (Jager et al., 2006). A direct consequence for risk assessors is that evaluation of  $LC(x, t)$  at early time  
 251 induces higher uncertainty than at a later time (specific time being relative to the species and the  
 252 compound). In other words, the sensitivity of  $LC(x, t)$  to time  $t$  decreases as long as  $t$  increases. For  
 253 instance, we see on Figures 1-(A,B) that a little change in time around day 2 leads to a greater change

254 in the estimation of  $LC(x, t)$  than around day 4. However, we have to note that the uncertainty of  
255  $LC(x, t)$  does not always decreases when time increases. For instance, in Figure 1-(B), the uncertainty  
256 at day 6 and afterwards is greater than around day 3.

257 When  $t$  increases to infinity, the  $LC(x, t)$  converges towards the distribution of parameter  $z$  for  
258 GUTS-RED-SD (see equation (11)) and  $m_w \sqrt{\frac{x}{100-x}}$  for GUTS-RED-IT (see equation (13)). The  
259 specific  $LC_{50,t}$  tends to  $z$  for GUTS-RED-SD and to  $m_w$  for GUTS-RED-IT (see equations (11) and  
260 (13)). The recommendation for risk assessors would be to use the advantages of TKTD models in order  
261 to extrapolate the  $LC(x, t)$  on a longer period than the duration of the experiment in order to visualize  
262 the uncertainties around the incipient  $LC(x, t)$  defined by the asymptote. At least, we recommend to  
263 look at the  $LC(x, t)$  at the last time of the experiment, what is in line with the common procedure in  
264 ERA.

### 265 3.2.2. $LC(x, t)$ as a function of percentage of affected population, $x$

266 From Figure 1-(C,D), we can see that the uncertainty of  $LC(x, t)$  is greater at low  $x$ , that is when  
267 the effect of the contaminant is weak. While computing  $LC(x, t)$  at  $x > 50\%$  is never used for ERA,  
268 we can also see that the uncertainty of  $LC(x, t)$  increases when  $x$  tends to 100%. As a consequence,  
269 while the uncertainty is not always minimal at the standard value of  $x = 50\%$ , it seems to be always  
270 smaller around this value than around  $x = 10\%$  another classical value used in ERA. Consequently, for  
271 risk assessors, while TKTD models allow to compute the  $LC(x, t)$  whatever  $x$ , if only one value has to  
272 be chosen, we recommend to keep the standard of  $x = 50\%$ . On the other hand, the risk assessor has  
273 to keep in mind that 50% is not the optimal threshold in term of reduction of uncertainty, depending  
274 on the data set, the model (GUTS-RED-SD or GUTS-RED-IT) and the parameter estimates.

### 275 3.3. Comparison of $MF(x, t)$ with GUTS-RED-SD and GUTS-RED-IT

#### 276 3.3.1. $MF(x, t)$ as a function of time $t$

277 As expected, Figures 2-(D-F) show that the multiplication factor is decreasing when the time at  
278 which the survival rate is checked increases. In other words, the later the survival rate is assessed,  
279 the lower is the multiplication factor. Also, these graphics reveal there is no typical pattern of curves  
280 of multiplication factors over time  $t$  of exposure. Under a constant exposure profile, the curve shows  
281 an exponential decreasing pattern, while under pulsed exposure, we observe a constant phase and,  
282 surrounding peaks, a sudden decrease of the multiplication factor. The multiplication factor is ob-  
283 viously highly variable around a pulse in the concentration of the chemical product. Therefore, a  
284 recommendation would be to wait for some times (e.g., several days) after a peak before computing  
285 a multiplication factor. More generally, the multiplication factor is designed to be compared with  
286 the assessment factor (AF) classically used in concert with the effect/lethal concentration value based  
287 on realistic time-variable exposure profiles to derive an EQS. As a consequence, when using  $MF(x, t)$

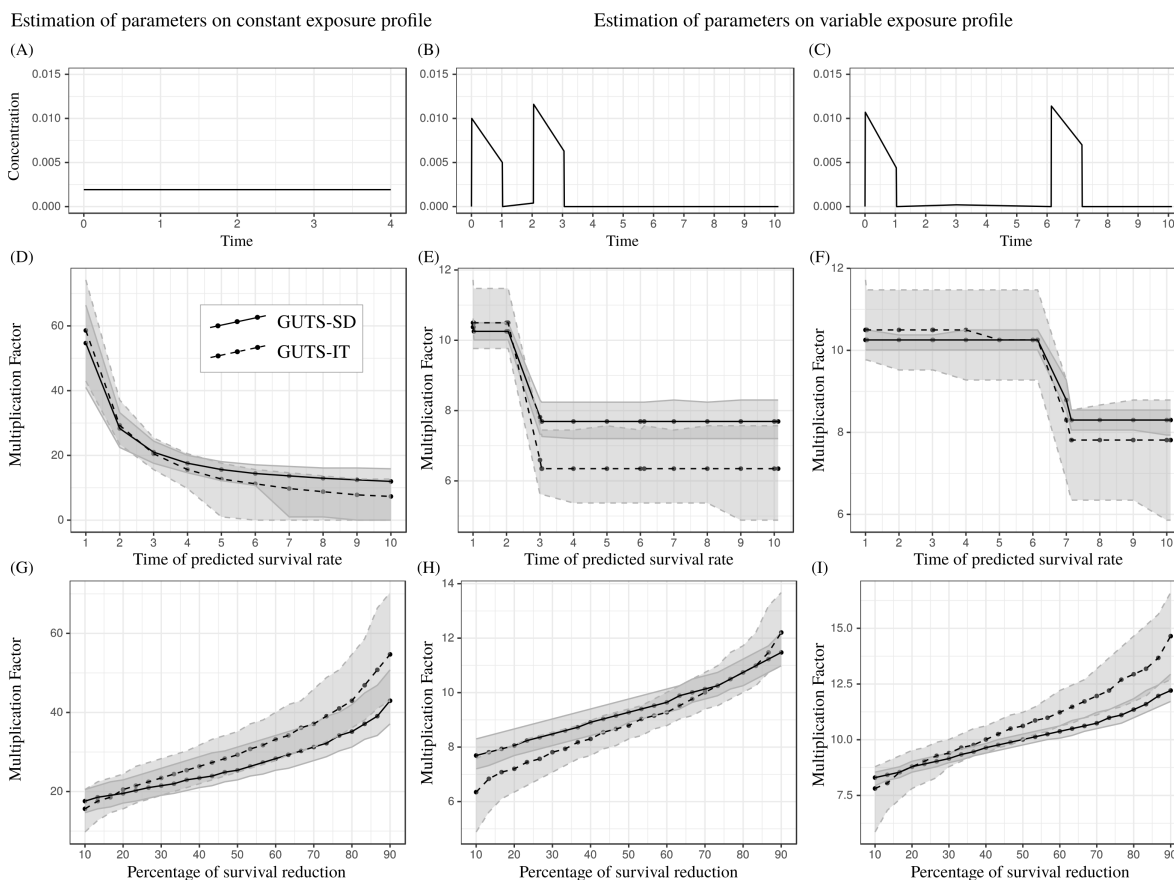

Figure 2: Comparison of  $MF(x, t)$  for GUTS-RED-SD, solid lines, and GUTS-RED-IT, dashed lines, for Cypermethrin (see Supplementary Material for other compounds). Parameters are estimated on data under constant (A, D, G) and variable (B, C, E, F, H, I) concentration profiles. (A-C) Exposure profiles, (D-F) Multiplication factors estimated for a 10% reduction of survival (i.e.  $MF(x = 10, t)$ ) along time. (G-I) Multiplication factors estimated at the end of experiments (time 4 for (G) and 10 for (H, I)) along the percentage of survival reduction.

288 based on real exposure profiles, it is important to pay close attention to the amplitudes and frequencies  
 289 of pulses, as well as to the times at which multiplication factors are computed. As for the  $LC(x, t)$ ,  
 290 taking advantage of TKTD capabilities to predict at any time is of real interest to described the  
 291 survival response under pulsed exposure.

### 292 3.3.2. $MF(x, t)$ as a function of percentage of survival reduction $x$

293 Logically, Figures 2-(G-I) show that the multiplication factor increases with the increase of the  
 294 percentage of reduction of the survival rate. An interesting results is the non-linearity of this increase.  
 295 As for the  $LC(x, t)$ , the uncertainty is greater at low and high percentages compared to what happens  
 296 in the middle around 50% of survival reduction. As a consequence, it would be relevant to fix 50% as  
 297 a standard for ERA.

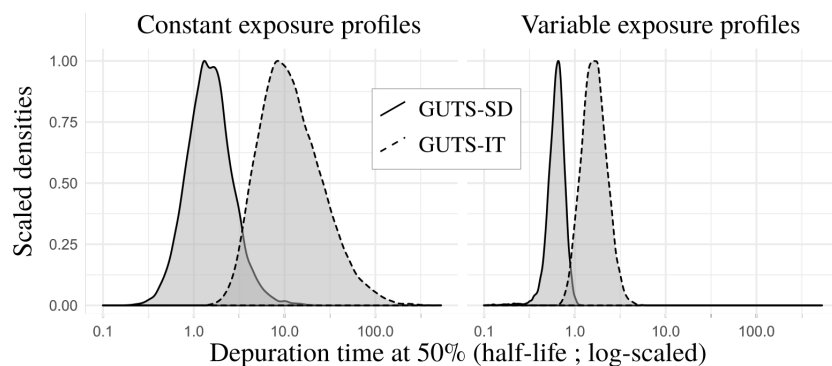

Figure 3: Distribution of estimated half-life for cypermethrin in GUTS-RED-SD and GUTS-RED-IT models for data sets under constant (left) and variables (right) exposure profiles. Median and 95% Credible interval of 50% depuration time are under constant exposure profiles 1.48 [0.502, 5.00] for GUTS-RED-SD and 10.8 [3.21, 68.5] for GUTS-RED-IT, and under variable exposure profiles 0.633 [0.386, 0.890] for GUTS-RED-SD and 1.62 [0.917, 3.06] for GUTS-RED-IT.

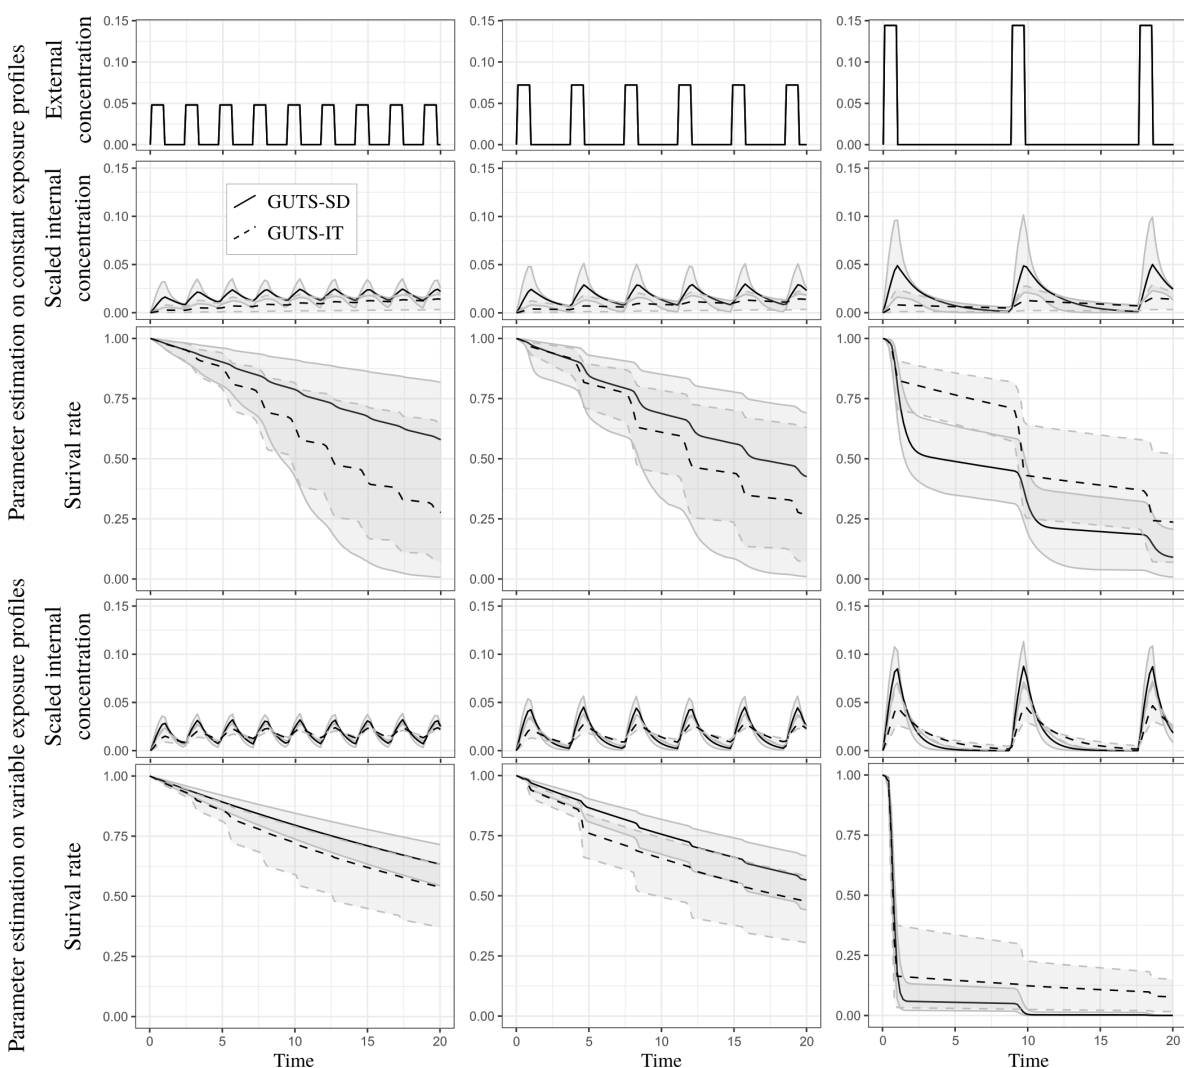

Figure 4: Survival rate over time with GUTS-RED-SD and GUTS-RED-IT models (respectively solid and dashed lines) under different exposure profiles with the same area under the curve (differences are in the duration time after pulses and in the maximal concentration of pulses). Parameters were estimated from the Cypermethrin data set, either under constant (upper panel of the figure) or time-variable (lower panel of the figure) exposure.

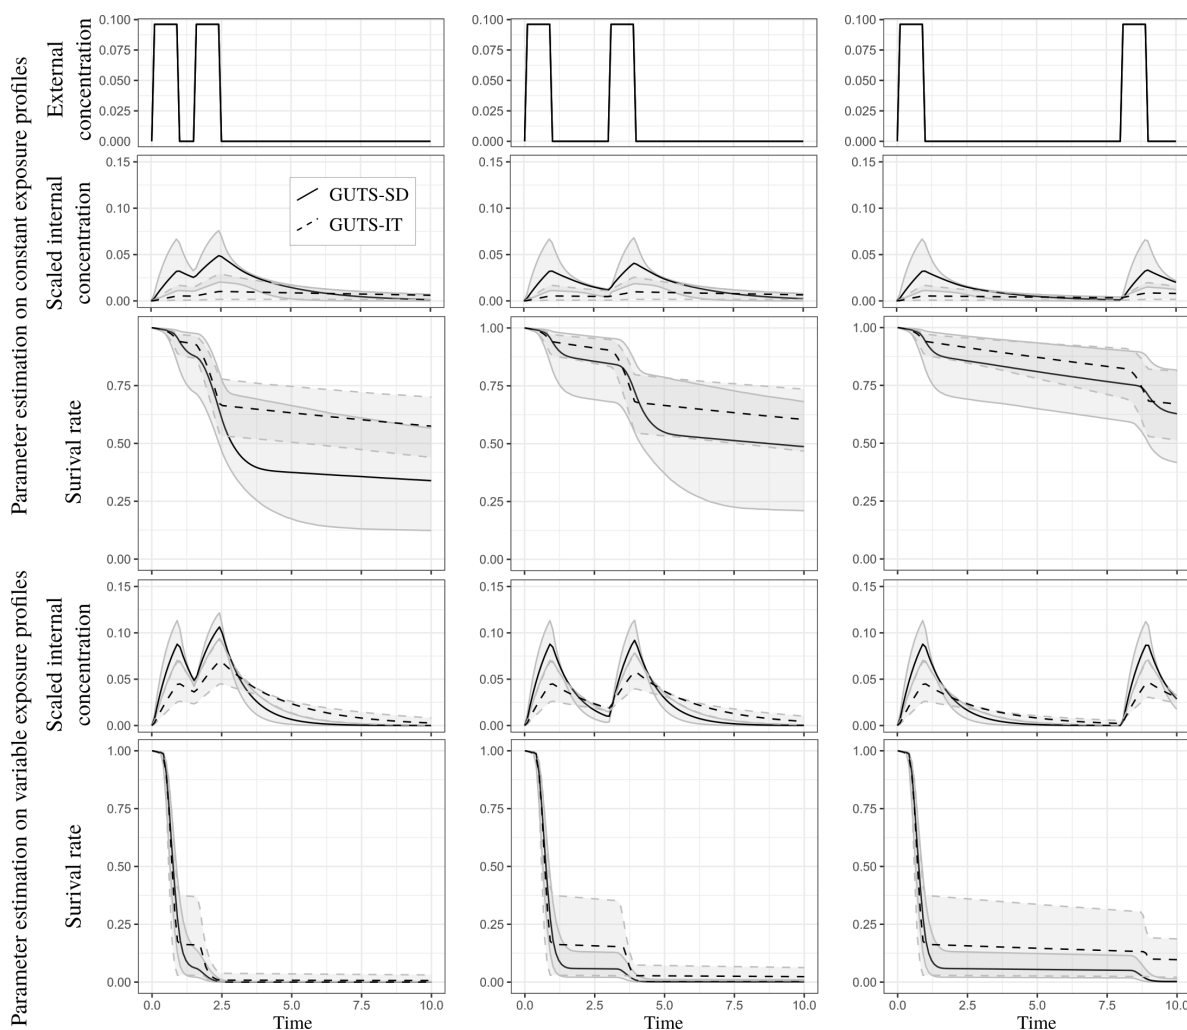

Figure 5: Survival rate over time with GUTS-RED-SD and GUTS-RED-IT models (respectively solid and dashed lines) under two pulsed exposure profile with the same area under the curve (differences are in the duration time between the two pulses). Parameters were estimated from Cypermethrin data set, either under constant (upper panel of the figure) or time-variable (lower panel of the figure) exposure.

### 298 3.4. Effect of the depuration time on the predicted survival rate

#### 299 3.4.1. Patterns of internal scaled concentration

300 The dominant rate constant,  $k_d$ , regulating the kinetics of the toxicant is always greater for GUTS-  
 301 RED-SD compared to GUTS-RED-IT, so that the depuration time for GUTS-RED-SD is always  
 302 smaller than for GUTS-RED-IT (see Figure 3 and Supplementary Material). As a consequence, un-  
 303 der time-variable exposure concentration, the internal scaled concentration with GUTS-RED-SD has  
 304 greater amplitude than with GUTS-RED-IT ( Figures 4, 5 and Supplementary Material). In other  
 305 words, toxicokinetics with GUTS-RED-IT is more smooth than with GUTS-RED-SD. The compen-  
 306 sation of the difference in  $k_d$ , and therefore in the scaled internal concentration comes from the other  
 307 paramaters: threshold  $z$  and killing rate  $k_k$  for GUTS-RED-SD, and median threshold  $m_w$  and shape  
 308  $\beta$  for GUTS-RED-IT. However, the calibration of models being based on the same observed number

309 of survivors, threshold parameter  $z$  for GUTS-RED-SD and the median of threshold  $m_w$  for GUTS-  
310 RED-IT are shifted .

### 311 *3.4.2. Variation in the number of pulses in exposure profiles*

312 A first step has been to explore the effect of the number of pulses (9, 6 and 3 pulses of one  
313 day each) along a period of 20 days with the same cumulative amount of contaminant in external  
314 concentration after the 20 days (Figure 4 and Supplementary Material). From a conservative approach  
315 for ERA, whatever the model, GUTS-RED-SD or GUTS-RED-IT, it seems better to have few pulses  
316 of high amplitude than frequent pulses of low amplitude. Indeed, the survival rate over time with  
317 only 3 high pulses is lower than the survival rate under frequent lower exposure. This is confirmed in  
318 Supplementary Material for Malathion and Propiconazole data sets. With GUTS mechanistic models,  
319 the higher is the pulse, the higher is the scaled internal concentration and so is the damage. Thus,  
320 from these simulations, we do not see the effect of the depuration time which could help individual to  
321 recover when reducing the frequency of peaks.

322 The comparison between constant and time-variable exposure profiles (Figure 4 and Supplementary  
323 Material) suggests that uncertainty is smaller when calibration has been done on data under time-  
324 variable exposure profile. The result is counterintuitive, especially since the number of time series  
325 was higher with constant exposure profiles what would reduce uncertainties of parameter estimates. If  
326 this result is confirmed, then it would be better to predict variable exposure profiles with parameters  
327 calibrated from time-variable exposure data sets.

### 328 *3.4.3. Variation in the period between two pulses*

329 In order to explore the effect of the depuration time, we simulated exposure profiles under two  
330 pulses with different time period between them (i.e., 1/2, 2 and 7 days). The cumulative amount of  
331 contaminant remains the same for the three simulations. Figure 5 shows that increasing the period  
332 between two pulses may increase the survival rate of individuals, whatever the model, GUTS-RED-SD  
333 or GUTS-RED-IT. This is a typical result of the depuration period which reduce the level of scaled  
334 internal concentration, and therefore reduces the damage. We can easily see that the highest scaled  
335 internal concentration is reached when the pulse interval is the smallest. In this situation, we clearly  
336 observe the addition of damages from the two pulses. Again, depuration time being different with  
337 the two GUTS models, results are also different. For ERA, having two close pulses being the most  
338 conservative, we recommend to perform such an experiment. However, the depuration time being  
339 the differentiating parameter of GUTS-RED-SD and GUTS-RED-IT, it is also relevant to add an  
340 experiment with two pulses separated by a long enough period in order to decorrelate their effect.  
341 Thus, having both correlated and uncorrelated experiments, we can better assess the influence of  
342 GUTS-RED-SD and GUTS-RED-IT hypothesis on the simulation outputs.



## 343 4. Discussion

### 344 4.1. Tracking uncertainties for environmental quality standards

345 Whatever the scientific field, risk assessment is by definition linked to the notion of probability,  
346 holding different uncertainties such as the variability between organisms and noises in observations.  
347 In this sense, tracking how the uncertainty propagates into models, from collected data to model  
348 calculations of toxicity endpoints that are finally used for EQS derivation is of fundamental interest  
349 for ERA. For ERA, having good fits over experimental data is not enough. Indeed, the key objective  
350 is the application of these fits to predict adverse effects under real environmental exposure profiles,  
351 and to derive robust EQS (Laskowski, 1995; Jager, 2011; Gray and Cohen, 2012; EFSA PPR, 2013;  
352 EFSA, 2018b). In this context, as we show in this paper, TKTD models calibrated under a Bayesian  
353 framework combines two great advantages: on one hand, TKTD models, such as the GUTS models,  
354 allow predictions of regulatory toxicity endpoints under any type of exposure profiles ; on the other  
355 hand, the Bayesian approach provides the marginal distribution of each parameter, and in this way,  
356 allows to track the uncertainty of any prediction of interest.

357 Previous studies investigating goodness-of-fit did not find typical differences between GUTS-RED-  
358 SD and GUTS-RED-IT models (Ashauer et al., 2013; Baudrot et al., 2018c). Here again, from the  
359 uncertainties in regulatory toxicity endpoints, we do not show evidence to choose GUTS-RED-SD  
360 compared to GUTS-RED-IT. A simple recommendation is therefore to use both and then to take the  
361 most conservative scenario in terms of ERA. With the 10 data sets we used and the 20 fittings we did,  
362 the four measures of goodness-of-fit show similar outputs for both GUTS-RED-SD and GUTS-RED-  
363 IT, under both constant and variables exposure profiles. The percentage of observed data lying in the  
364 95 % predicted credible interval, denoted  $\%PPC$  has the advantage of being linked to visual graphics,  
365 PPC plots, and is therefore easier to interpret for risk assessors and stackholders (Beck et al., 2016).  
366 However, it may hide a very large uncertainty due to its limitation to 100 % of covering. WAIC and  
367 LOO-CV criteria are more robust probability measures (Gelman et al., 2013). Since NRMSE is easy  
368 to calculate whatever the inference methods (e.g., Maximum Likelihood Estimation), it could be a  
369 relevant measure to check the goodness-of-fit of models.

### 370 4.2. What about the use and abuse of the lethal concentration?

371 After checking the quality of model parameter calibration, the next question is about the uncer-  
372 tainty in toxicity endpoints to derive EQS. Lethal concentrations are nowadays a standard for hazard  
373 characterization at levels of 10, 20 and 50 % effect on the population. Many criticisms have been ad-  
374 dressed to the lethal and effective concentrations for  $x\%$  of the population and other related measures  
375 (Jager, 2011). For instance, the classical way to compute the lethal concentration, at the final point,  
376 removes information provided by the observations made all along the experiment, and hides the time

377 dependency. For the lethal effect, a classical approach to limit the variability of time duration, is to  
378 consider a long enough exposure duration in order to obtain the incipient  $LC(x, t \rightarrow +\infty)$  (Jager et al.,  
379 2006), that is when the  $LC(x, t)$  reaches its asymptote and does not change with increasing duration  
380 of exposure as observed on Figure 1. We provide mathematical expression of  $LC(x, t)$  convergence,  
381 and explicit results when  $x = 50\%$  for both GUTS models. We can therefore use the joint posterior  
382 parameter distribution provided by the Bayesian inference to compute the distribution the incipient  
383  $LC$ .

384 A consequence of the exponential decay of  $LC(x, t)$  with increasing time  $t$ , is that the uncertainty  
385 is greater at early time where a small change in time  $t$  induces a great change in the  $LC(x, t)$  whatever  
386  $x$ . For this reason, classical measures of  $LC$  are done at the latest time of experiments. Hence, to  
387 compare  $LC(x, t)$  of different compounds or species that may require different duration of experiments,  
388 using TKTD to extrapolate at other time points is of great advantage. Also, in order to reduce the  
389 uncertainty, extrapolation to greater time would be a preferable choice.

390 We show in this study that the uncertainty of  $LC(x, t)$  is different according to percentage  $x$  under  
391 consideration (Figure 1). It appears this uncertainty is limited around 50%, while not specifically at  
392 50%, what is in favor of the classical approach to return the  $LC_{50}$ . However, it is still of real importance  
393 to report the uncertainty of the toxicity endpoints since we show it can drastically change depending  
394 on the experimental design, the combination product-species.

395 Among the criticisms of the  $LC(x, t)$ , one is that it is meaningful only under a set of constant  
396 environmental conditions including a constant exposure profile (Jager et al., 2006; Jager, 2011). When  
397 the concentration of chemical compounds is highly variable over time in the environment, the use of  
398 toxicity endpoints based on toxicity data for constant exposure profiles may hide some processes, such  
399 as the response to pulses of exposure. This is the reason underlying the interest of multiplication factor  
400 for ERA (Ashauer et al., 2013).

#### 401 4.3. What does it mean to take a margin of safety?

402 The deduction of a margin of safety from a multiplication factor,  $MF(x, t)$ , quantifies how far the  
403 exposure profile is below toxic concentrations (Ashauer et al., 2013). Then, a key question for risk  
404 assessors is to target the safest exposure duration,  $t$ , and percentage of effect on survival,  $x$ . Our  
405 study show a lower uncertainty around an  $x$  value of 50 %. Thus, to reduce the uncertainty of the  
406  $MF(x, t)$  estimation we recommend to select 50%, at least for comparison between studies. We also  
407 show that under constant exposure profiles, there is an asymptotic shape of the  $MF(x, t)$  as it is for  
408  $LC(x, t)$ . There is an incipient value of the multiplication factor for any  $x$  when  $t$  goes to a long  
409 time. Therefore, under constant profiles, we could recommend to use the latest time of the exposure  
410 profile for toxicity endpoints in order to reduce the sensitivity of the  $MF(x, t)$  estimation. However,  
411 the  $MF(x, t)$  is meaningful when applied on realistic exposure profiles which are rarely constant, and

our study shows that there is no asymptotic shape in such situations. In addition, we observed a great sensitivity of the multiplication factor around peaks in the exposure profiles, that is a high variation of the  $MF(x, t)$  with a little change in time  $t$ . As a consequence, the assessors has to be very careful about the characteristics of pulses in the exposure profiles in order to understand how they drive changes in the multiplication factor. To do so, we recommend to compute the multiplication factor all along the period of the exposure profile, rather than choosing a single distribution at a specific time.

#### 4.3.1. Depuration time

The survival response to pulses depends on the depuration time driven by the toxicokinetics part of the TKTD model. The kinetics of assimilation and elimination of compounds integrated within the toxicokinetic module is a fundamental part of ecotoxicological models (Wang and Fisher, 1999). In reduced GUTS models, GUTS-RED-SD and GUTS-RED-IT, we assume no measure of the internal concentration, which is therefore calibrated at the same time as other parameters included in the toxicodynamics part. The resulting "scaled internal concentration" is linked to a level of damage defined by the toxicodynamic which has two different hypotheses on the death mechanism for GUTS-RED-SD and GUTS-RED-IT. The mechanistic construction of the model, reflecting biological processes, may be misleading since the toxicokinetic is defined independently of the toxicodynamic part which is chosen afterwards. What is true in the mechanism is not in the inference process where the model parameters, from TK and TD parts, are calibrated all together. As a consequence, as illustrated with our results, the scaled internal concentration does not have the same biological meaning in GUTS-RED-SD and GUTS-RED-IT, and therefore cannot be directly compared between both models.

In both models of course, from the underlying mechanism, we know that damage is positively correlated with pulse amplitude: lower amplitude, lower damage, as we observed from Figure 4. A result is that, with the same cumulative amount of contaminant along an experiment, using fewer pulses reduces final survival rates. So, the most conservative experimental design is the one with fewer pulses of relatively high amplitudes.

Furthermore, from Figure 5, we bring to light the effect of the depuration time. When pulses are close, the organisms do not have time to depurate and therefore there is an addition of the damage and finally a cumulative effect on survival. As a consequence, on a long enough experiment, when pulses become less correlated in terms of cumulative damage, then the final survival rate increases. Because of this, we recommend an experimental design with two close pulses. However, to have a better calibration of the toxicokinetic parameter, it is important to also have two uncorrelated pulses in the experimental design.

Finally, our study reveals that the uncertainty for prediction under time-variable exposure profiles seems to be smaller when calibration was performed with data sets under time-variable rather than under constant exposure profiles. While this observation makes theoretical sense since predictions are

447 made on the same type of profile than calibration of parameters, further empirical studies have to be  
448 performed to confirm this point.

449 The environmental dynamics of chemical compounds can be highly variable depending on the whole  
450 environmental context (e.g., anthropogenic activities, geochemical kinetics, ecosystem processes) but  
451 also on the chemical and bio-transformation of the compound under study. Therefore, as a general  
452 recommendation, we would like to point out the relevancy of experimenting several type of expo-  
453 sure profiles. Basically, the control and both constant and time-variable exposure profiles including  
454 toxicologically dependent and independent pulses seem to be the minimum requirement.

#### 455 *4.4. Practical use of GUTS models*

##### 456 *4.4.1. Optimization of experimental design*

457 The complexity of environmental systems combined with the thousand of compounds produced  
458 by human activities implies to assess environmental risk for a huge set of species-compounds combi-  
459 nation (Ashauer and Jager, 2018). As a direct consequence, optimizing experimental design in order  
460 to maximize the gain of high-quality information from experiments is a challenging requisite, where  
461 mechanism-based models combined with the Bayesian approach offer several tools (Albert et al., 2012).  
462 A next step of the present study is to use the joint posterior distribution of parameter, and the distri-  
463 bution of toxicity endpoints in order to quantify the gain of knowledge of several potential experiments  
464 in order to select the most informative. The next objective is thus to develop a framework that could  
465 help the construction of new experimental designs in order to minimize their complexity and their  
466 number while maximizing the robustness of toxicity endpoint estimates.

##### 467 *4.4.2. Implementation*

468 Although their many advantages, TKTD models, and therefore GUTS models, still remain little  
469 used. This is due to their mathematical complexity based on differential equations that need to be  
470 numerically integrated when fitted to data (Albert et al., 2016). Associated to their promotion within  
471 regulatory documents associated to ERA, the use of GUTS models could be further extended when  
472 available within a software environment allowing their handling without immersing into technicalities.  
473 Nowadays, several software allow to overpass these difficulties (Jager and Ashauer, 2018; Albert and  
474 Vogel, 2017; Baudrot et al., 2018a), and a web-platform is also proposed (Baudrot et al., 2018d).

##### 475 *4.4.3. Limitations*

476 Survival is the most often observed response of a chemical toxic effect in the environment, but  
477 sub-lethal effects may be more relevant to manage for ERA, to prevent community collapse (Baudrot  
478 et al., 2018b). While the lethal concentration decreases when time increases, other sub-lethal effects  
479 (e.g., reproduction, growth) does not always follow this pattern (Álvarez et al., 2006; Jager, 2011).  
480 The levels of concentration in acute toxicity tests are higher than those classically observed in the

481 environment. Therefore, under real environmental condition, sub-lethal effects may have more direct  
482 impacts on the population dynamics than effects on survival. Thus, it would be of real interest to  
483 encompass different effects in a global TKTD approach, in order to better predict when scaling-up at  
484 population and community levels (Jager, 2011).

485 Another well-known limitation is the derivation of EQS from specific species-compound combi-  
486 nation. In order to extrapolate ecotoxicological information from a set of single species tests to a  
487 community, ERA uses Species Sensitivity (Weighted) Distribution, SS(W)D, which can be used to  
488 derive EQS covering a set of taxonomically different species (Duboudin et al., 2004). This calculation  
489 is classically applied on  $LC(x, t)$  and could be easily done with  $MF(x, t)$  with the benefit to be applied  
490 on time-variable exposure profiles (EFSA, 2018b).

#### 491 4.5. Conclusion

492 As recently written by EFSA experts: "*uncertainty analysis is the process of identifying limitations*  
493 *in scientific knowledge and evaluating their implications for scientific conclusions*" (EFSA, 2018a).  
494 Description of uncertainties increases transparency and trust in scientific outputs and is therefore a  
495 key for an applied science such as ecotoxicology (Beck et al., 2016). Here, we evaluated the combination  
496 of mechanism-based models with the Bayesian inference framework to track uncertainties on toxicity  
497 endpoints used in regulatory risk assessment from one compound-one species survival bioassay. A lot  
498 of other kind of uncertainties emerge all along the decision chain, from the hazard identification to the  
499 characterization of risk. Focusing on uncertainty should be of concern at every steps, and above all,  
500 for any information returned by mathematical-computational models.

#### 501 Acknowledgement

502 The authors are very grateful for inputs from Theo Brock on an earlier version of the manuscript.  
503 The authors also thank the French National Agency for Water and Aquatic Environments (ONEMA,  
504 now the French Agency for Biodiversity) for its financial support. The authors declare no competing  
505 interests.

506 **References**

- 507 Albert, C., Ashauer, R., Künsch, H., Reichert, P., 2012. Bayesian experimental design for a  
508 toxicokinetic–toxicodynamic model. *Journal of statistical planning and inference* 142 (1), 263–275.
- 509 Albert, C., Vogel, S., 2017. GUTS: Fast Calculation of the Likelihood of a Stochastic Survival Model.  
510 R package version 1.0.4.  
511 URL <https://CRAN.R-project.org/package=GUTS>
- 512 Albert, C., Vogel, S., Ashauer, R., 2016. Computationally efficient implementation of a novel algorithm  
513 for the general unified threshold model of survival (guts). *PLoS Comput Biol* 12 (6), e1004978.
- 514 Álvarez, O. A., Jager, T., Redondo, E. M., Kammenga, J. E., 2006. Physiological modes of action  
515 of toxic chemicals in the nematode *acroboloides nanus*. *Environmental Toxicology and Chemistry*  
516 25 (12), 3230–3237.
- 517 Ashauer, R., Albert, C., Augustine, S., Cedergreen, N., Charles, S., Ducrot, V., Focks, A., Gabsi, F.,  
518 Gergs, A., Goussen, B., et al., 2016. Modelling survival: exposure pattern, species sensitivity and  
519 uncertainty. *Scientific Reports* 6.
- 520 Ashauer, R., Hintermeister, A., Potthoff, E., Escher, B. I., 2011. Acute toxicity of organic chemicals to  
521 *gammarus pulex* correlates with sensitivity of *daphnia magna* across most modes of action. *Aquatic*  
522 *toxicology* 103 (1), 38–45.
- 523 Ashauer, R., Jager, T., 2018. Physiological modes of action across species and toxicants: the key to  
524 predictive ecotoxicology. *Environmental Science: Processes & Impacts*.
- 525 Ashauer, R., Thorbek, P., Warinton, J. S., Wheeler, J. R., Maund, S., 2013. A method to predict and  
526 understand fish survival under dynamic chemical stress using standard ecotoxicity data. *Environ-*  
527 *mental toxicology and chemistry* 32 (4), 954–965.
- 528 Baudrot, V., Charles, S., Delignette-Muller, M. L., Duchemin, W., Kon-Kam-king, G., Lopes, C., Ruiz,  
529 P., Veber, P., 2018a. morse: MOdelling Tools for Reproduction and Survival Data in Ecotoxicology.  
530 R package version 3.0.0.  
531 URL <https://cran.r-project.org/web/packages/morse/index.html>
- 532 Baudrot, V., Fritsch, C., Perasso, A., Banerjee, M., Raoul, F., 2018b. Effects of contaminants and  
533 trophic cascade regulation on food chain stability: Application to cadmium soil pollution on small  
534 mammals–raptor systems. *Ecological Modelling* 382, 33–42.
- 535 Baudrot, V., Preux, S., Ducrot, V., Pavé, A., Charles, S., 2018c. New insights to compare and choose  
536 tktd models for survival based on an inter-laboratory study for *Lymnaea stagnalis* exposed to cd.  
537 *Environmental science & technology* 52, 1582–1590.

- 538 Baudrot, V., Veber, P., Gence, G., Charles, S., 2018d. Fit guts reduced models online: from theory to  
539 practice. *Integrated environmental assessment and management*.
- 540 Beck, N. B., Becker, R. A., Erraguntla, N., Farland, W. H., Grant, R. L., Gray, G., Kirman, C.,  
541 LaKind, J. S., Lewis, R. J., Nance, P., et al., 2016. Approaches for describing and communicating  
542 overall uncertainty in toxicity characterizations: Us environmental protection agency’s integrated  
543 risk information system (iris) as a case study. *Environment international* 89, 110–128.
- 544 Brock, T. C., 2009. *Linking aquatic exposure and effects: risk assessment of pesticides*. CRC Press.
- 545 Delignette-Muller, M. L., Ruiz, P., Veber, P., 2017. Robust fit of toxicokinetic–toxicodynamic models  
546 using prior knowledge contained in the design of survival toxicity tests. *Environmental Science &*  
547 *Technology* 51 (7), 4038–4045.
- 548 Duboudin, C., Ciffroy, P., Magaud, H., 2004. Effects of data manipulation and statistical methods on  
549 species sensitivity distributions. *Environmental Toxicology and Chemistry* 23 (2), 489–499.
- 550 ECHA, 2017. *Guidance on information requirements and chemical safety assessment*.
- 551 EFSA, 2018a. *Guidance on uncertainty analysis in scientific assessments*. *EFSA Journal* 16 (1).
- 552 EFSA, 2018b. *Scientific Opinion on the state of the art of Toxicokinetic/Toxicodynamic (TKTD) effect*  
553 *models for regulatory risk assessment of pesticides for aquatic organisms*. *EFSA Journal* (to appear).
- 554 EFSA PPR, 2013. *Guidance on tiered risk assessment for plant protection products for aquatic organ-*  
555 *isms in edge-of-field surface waters*. *EFSA Journal* 11 (7), 3290.
- 556 Ferson, S., 2005. *Bayesian methods in risk assessment*. Unpublished Report Prepared for the Bureau  
557 de Recherches Geologiques et Minieres (BRGM). New York.
- 558 Gabry, J., Mahr, T., 2017. *bayesplot: Plotting for Bayesian Models*. R package version 1.4.0.  
559 URL <https://CRAN.R-project.org/package=bayesplot>
- 560 Gelman, A., Carlin, J. B., Stern, H. S., Dunson, D. B., Vehtari, A., Rubin, D. B., 2013. *Bayesian data*  
561 *analysis*. Chapman and Hall/CRC.
- 562 Gray, G. M., Cohen, J. T., 2012. Policy: rethink chemical risk assessments. *Nature* 489 (7414), 27.
- 563 Grimm, V., Berger, U., 2016. Robustness analysis: Deconstructing computational models for ecological  
564 theory and applications. *Ecological modelling* 326, 162–167.
- 565 Hommen, U., Forbes, V., Grimm, V., Preuss, T. G., Thorbek, P., Ducrot, V., 2016. How to use mecha-  
566 nistic effect models in environmental risk assessment of pesticides: case studies and recommendations  
567 from the setac workshop modelink. *Integrated environmental assessment and management* 12 (1),  
568 21–31.

- 569 Isigonis, P., Ciffroy, P., Zabeo, A., Semenzin, E., Critto, A., Giove, S., Marcomini, A., 2015. A multi-  
570 criteria decision analysis based methodology for quantitatively scoring the reliability and relevance  
571 of ecotoxicological data. *Science of the Total Environment* 538, 102–116.
- 572 Jager, T., 2011. Some good reasons to ban ec x and related concepts in ecotoxicology.
- 573 Jager, T., Albert, C., Preuss, T. G., Ashauer, R., 2011. General unified threshold model of survival  
574 - a toxicokinetic-toxicodynamic framework for ecotoxicology. *Environmental Science & Technology*  
575 45 (7), 2529–2540.
- 576 Jager, T., Ashauer, R., 2018. Modelling survival under chemical stress. A comprehensive guide to the  
577 GUTS framework. Version 1.0. Leanpud.
- 578 Jager, T., Heugens, E. H., Kooijman, S. A., 2006. Making sense of ecotoxicological test results: towards  
579 application of process-based models. *Ecotoxicology* 15 (3), 305–314.
- 580 Laskowski, R., 1995. Some good reasons to ban the use of noec, loec and related concepts in ecotoxi-  
581 cology. *Oikos*, 140–144.
- 582 Nyman, A.-M., Schirmer, K., Ashauer, R., 2012. Toxicokinetic-toxicodynamic modelling of survival of  
583 gammarus pulex in multiple pulse exposures to propiconazole: model assumptions, calibration data  
584 requirements and predictive power. *Ecotoxicology* 21 (7), 1828–1840.
- 585 Plummer, M., 2016. rjags: Bayesian Graphical Models using MCMC. R package version 4-6.  
586 URL <https://CRAN.R-project.org/package=rjags>
- 587 Reinert, K. H., Giddings, J. M., Judd, L., 2002. Effects analysis of time-varying or repeated exposures  
588 in aquatic ecological risk assessment of agrochemicals. *Environmental Toxicology and Chemistry*  
589 21 (9), 1977–1992.
- 590 Syberg, K., Hansen, S. F., 2016. Environmental risk assessment of chemicals and nanomaterials—the  
591 best foundation for regulatory decision-making? *Science of the Total Environment* 541, 784–794.
- 592 Wang, W.-X., Fisher, N. S., 1999. Assimilation efficiencies of chemical contaminants in aquatic inver-  
593 tebrates: a synthesis. *Environmental toxicology and chemistry* 18 (9), 2034–2045.
